# Supplementary material for: ZIF-67-modified magnetic nanoparticles for extraction of phenoxy carboxylic acid herbicides
Source: Royal Society of Chemistry journal article supplement (doi:10.1039/d3ay01257c), 2023-01-01
Supplement: d3ay01257c1.pdf [file d3ay01257c1.pdf]

## **ZIF-67 modified magnetic nanoparticles for extraction of phenoxy carboxylic acids herbicides**

*Shengyu Cao<sup>a</sup>, Chudi Yang<sup>a</sup>, Lili Lian<sup>\*a,b</sup>, Shanshan Huang<sup>b</sup>, Minhong Ren<sup>b</sup>, Dazhi Sun<sup>\*a</sup>*

*<sup>a</sup>Department of Analytical Chemistry, Jilin Institute of Chemical Technology, Jilin, China;*

*<sup>b</sup>Department of Analytical Chemistry, Guangxi Vocational & Technical Institute of Industry, Guangxi, China.*

### **Corresponding Author**

\*Lili Lian. Email address: [4159495@163.com](mailto:4159495@163.com)

Pages: 6

**UPLC conditions.**

The TUV detector was operated at a wavelength of 230 nm. Chromatographic separation was performed on a BET C18 analytical column (50 mm × 2.1 mm, 1.7 μm) maintained at a temperature of 35°C. The mobile phase consisted of 0.15% ammonium acetate solvent (A) and acetonitrile (B). The gradient elution was optimized as follows: 0-3 min, 80% A; 3-5.5 min, 80%-45% A; 5.5-6 min, 45% A; 6-8 min, 45%-80% A; 8-10 min, 80% A. The flow rate was maintained at 0.3 mL/min, and the injection volume was 10 μL.

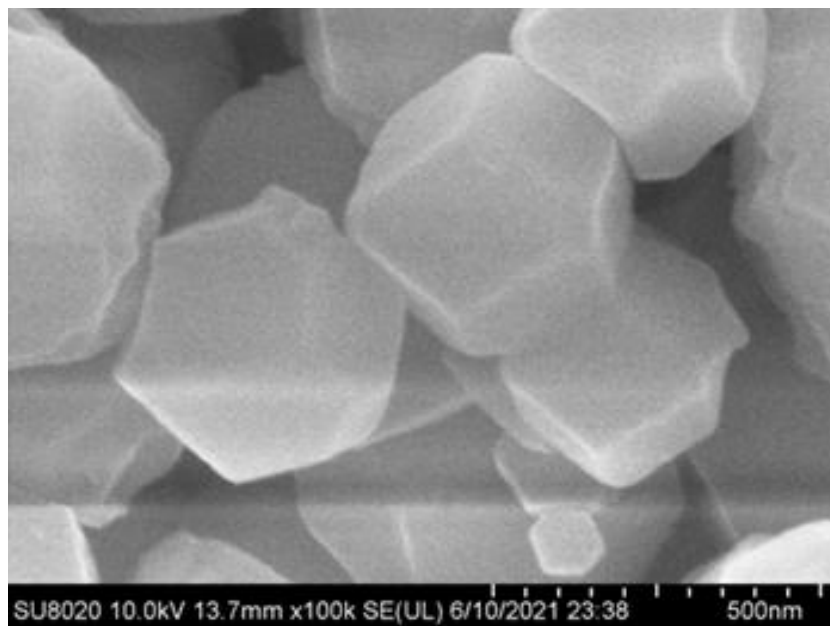

Fig. S1. ZIF-67 prepared without addition of  $\text{Fe}_3\text{O}_4$  MNPs as seeds.

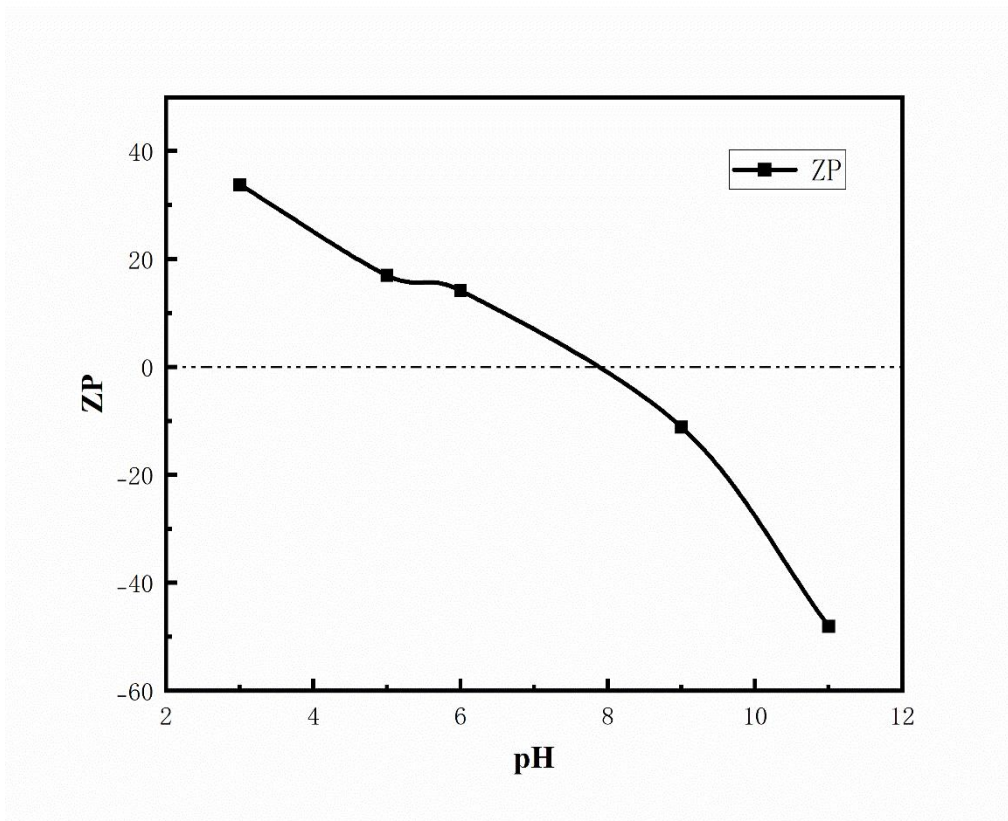

Fig. S2. ZIF-67@Fe<sub>3</sub>O<sub>4</sub> Zeta potential at different pH values.

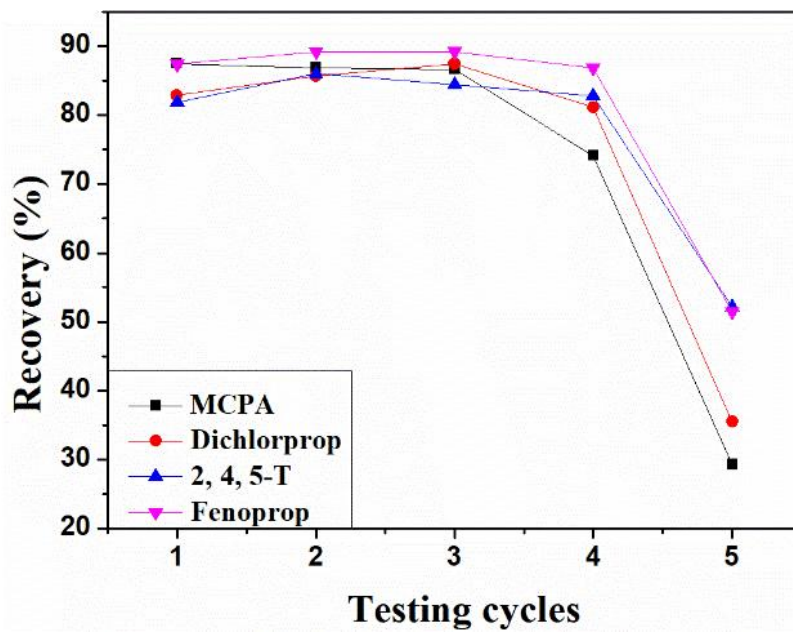

Fig. S3. Investigation on the recycling performance of ZIF-67@Fe<sub>3</sub>O<sub>4</sub>.

**Table S1**

Intra-day and inter-day RSDs of the proposed method.

| PCA         | Spiked( $\mu\text{g/L}$ ) | Intra-day (n=3) | Inter-day (n=3) |
|-------------|---------------------------|-----------------|-----------------|
|             | 1                         | 4.17            | 2.41            |
| MCPA        | 0.25                      | 3.67            | 6.37            |
|             | 0.1                       | 0.16            | 3.24            |
|             | 1                         | 2.68            | 1.96            |
| Dichlorprop | 0.25                      | 2.80            | 7.75            |
|             | 0.1                       | 2.21            | 3.87            |
|             | 1                         | 1.57            | 2.38            |
| 2, 4, 5-T   | 0.25                      | 1.78            | 4.38            |
|             | 0.1                       | 2.64            | 3.52            |
|             | 1                         | 3.32            | 2.40            |
| Fenoprop    | 0.25                      | 3.74            | 5.29            |
|             | 0.1                       | 0.84            | 1.24            |
